# Supplementary material for: Facile synthesis of Pd nanostructures in hexagonal mesophases as a promising electrocatalyst for ethanol oxidation
Source: Royal Society of Chemistry journal article supplement (doi:10.1039/c5ta00923e), 2015-01-01
Supplement: c5ta00923e1.pdf [file c5ta00923e1.pdf]

## Supplementary Information

### Facile synthesis of Pd nanostructures in hexagonal mesophases as promising electrocatalyst for ethanol oxidation

Srabanti Ghosh<sup>a,b\*</sup>, Hynd Remita<sup>b,c</sup>, Prasenjit Kar<sup>a</sup>, Susobhan Choudhury<sup>a</sup>, Samim Sardar<sup>a</sup>, Patricia Beaunier<sup>d</sup>, Partha Sarathi Roy<sup>e</sup>, Swapan Kumar Bhattacharya<sup>e</sup>, Samir Kumar Pal<sup>a</sup>

<sup>a</sup>Department of Chemical, Biological and Macromolecular Sciences, S. N. Bose National Centre for Basic Sciences, Block JD, Sector III, Salt Lake, Kolkata 700 098, India

<sup>b</sup>Laboratoire de Chimie Physique, UMR 8000-CNRS, Université Paris-Sud, 91405 Orsay Cedex, France

<sup>c</sup>CNRS, Laboratoire de Chimie Physique, UMR 8000, 91405 Orsay, France

<sup>d</sup>Sorbonne Universités, UPMC Univ. Paris 06, UMR 7197-CNRS, Laboratoire de Réactivité de Surface, F-75005 Paris, France

<sup>e</sup>Physical Chemistry Section, Department of Chemistry, Jadavpur University, Kolkata, 700 032, India

#### List of contents:

**Figure S1** FTIR spectra of surfactant, Pd complex and Pd nanoparticles synthesized in hexagonal mesophases.

**Figure S2** (a) Polarized light micrograph of pure mesophases in the presence of 0.1 M NaCl, (b) Polarized light micrograph of doped mesophases with 0.1 M Pd complex, (c) and (d) Pd complex doped mesophases after 12 and 24 hours photo irradiation respectively. After photo reduction of Pd complex, Pd nanostructures shows a large degree of preservation of the birefringent pattern indicative of the stability of hexagonal LC phase.

**Figure S3** Transmission electron micrographs of Pd nanostructures synthesized in hexagonal mesophases by 5 hrs UV-irradiation.

**Figure S4** (a-b) higher resolution transmission electron micrographs and (c) layered morphologies RGO nanosheets synthesized by gamma-irradiation.

**Figure S5** Cyclic voltammograms of reduced RGO nanosheets in 1M NaOH (black solid line curve) and with the electrocatalytic oxidation of 1 M EtOH in 1 M NaOH (red solid line). The working electrode was a glassy carbon disk modified with the RGO Pd nanosheets. The reference electrode was an Hg/HgO (1 M KOH) electrode. The scan rate was 50 mVs<sup>-1</sup>.

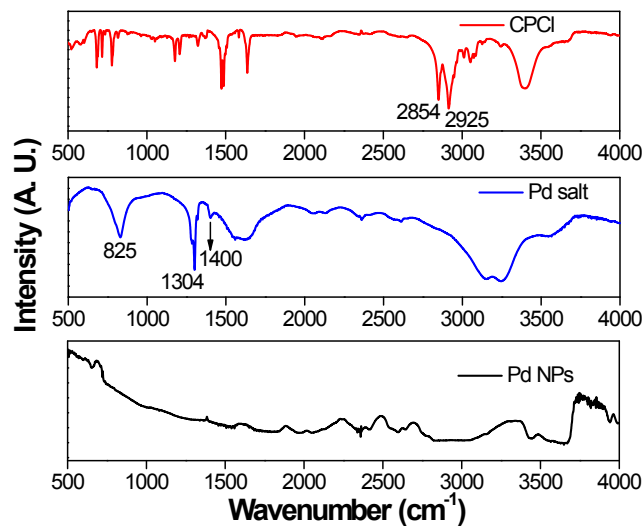

**Figure S1** FTIR spectra of surfactant, Pd complex and Pd nanoparticles synthesized in hexagonal mesophases.

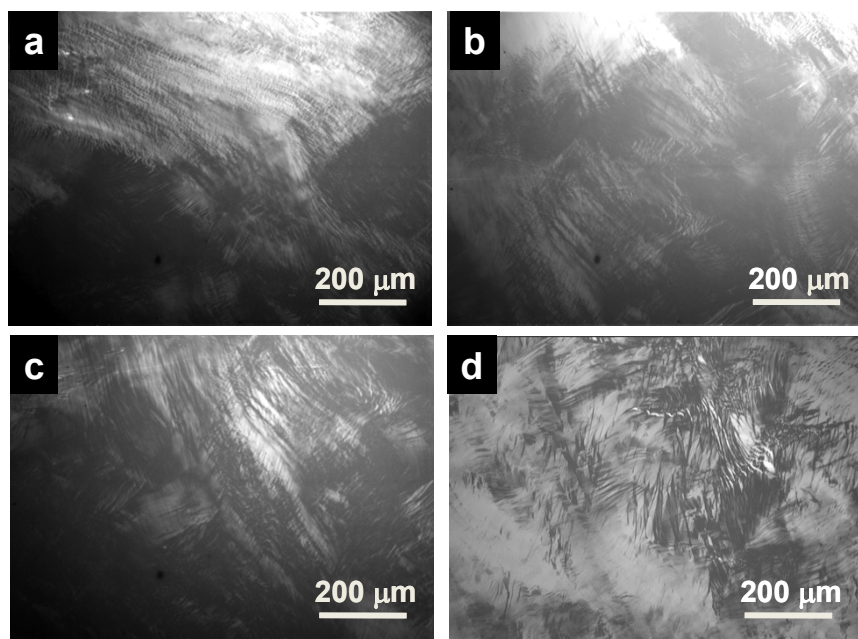

**Figure S2** (a) Polarized light micrograph of pure mesophases in the presence of 0.1 M NaCl, (b) Polarized light micrograph of doped mesophases with 0.1 M Pd complex, (c) and (d) Pd complex doped mesophases after 12 and 24 hours photo irradiation respectively. After photo reduction of

Pd complex, Pd nanostructures shows a large degree of preservation of the birefringent pattern indicative of the stability of hexagonal LC phase.

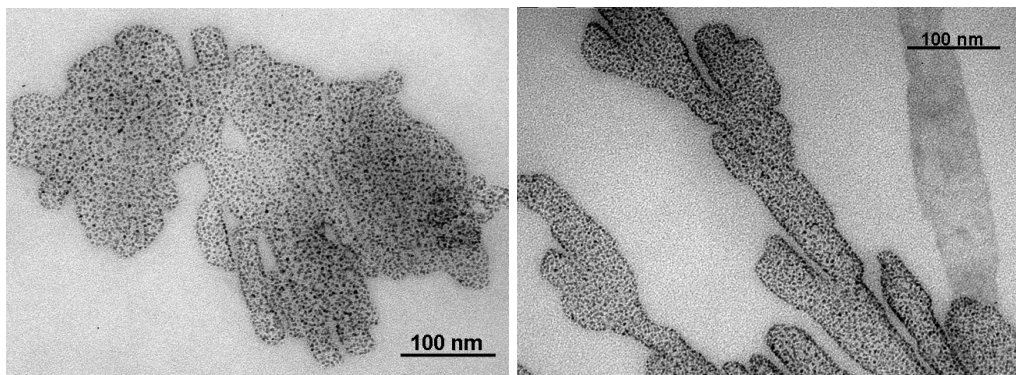

**Figure S3** Transmission electron micrographs of Pd nanostructures synthesized in hexagonal mesophases by 5 hrs UV-irradiation.

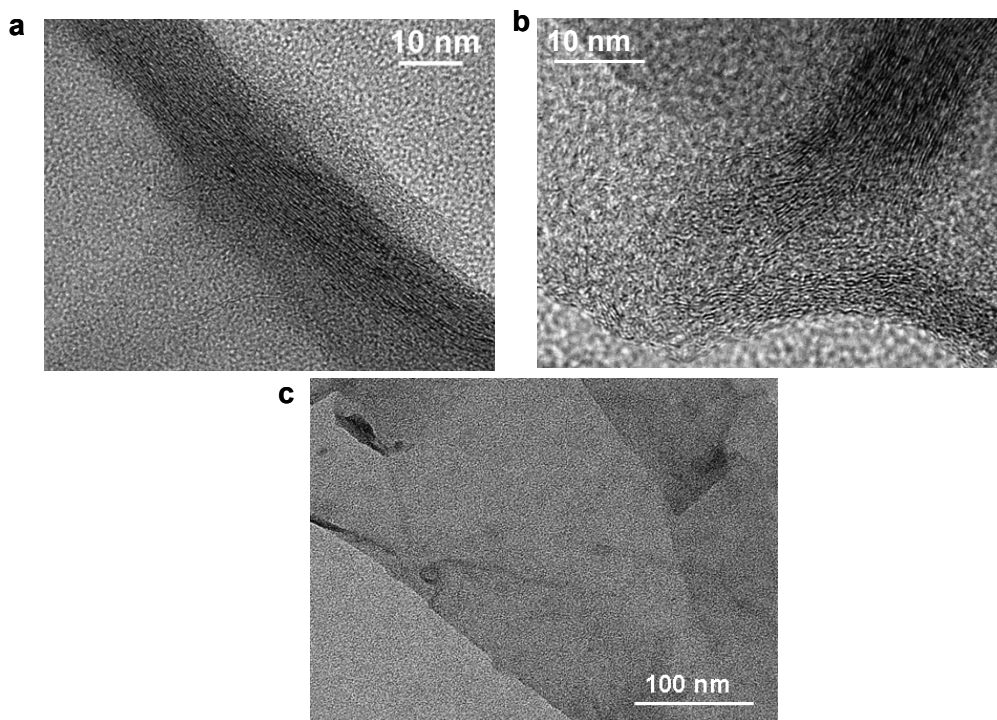

**Figure S4** (a-b) higher resolution transmission electron micrographs and (c) layered morphologies RGO nanosheets synthesized by gamma-irradiation.

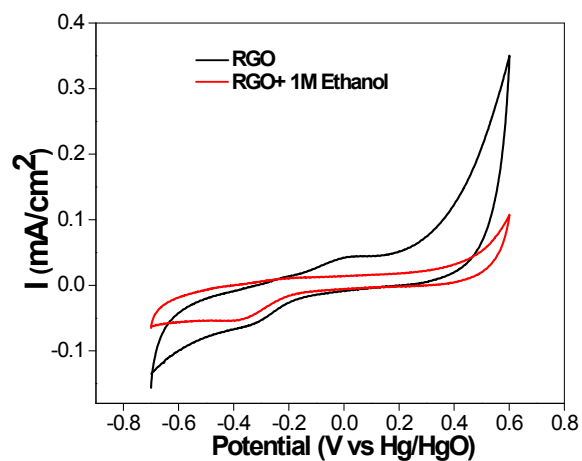

**Figure S5** Cyclic voltammograms of reduced RGO nanosheets in 1M NaOH (black solid line curve) and with the electrocatalytic oxidation of 1 M EtOH in 1 M NaOH (red solid line). The working electrode was a glassy carbon disk modified with the RGO nanosheets. The reference electrode was an Hg/HgO (1 M NaOH) electrode. The scan rate was 50 mVs<sup>-1</sup>.
